# Supplementary material for: Development of an Experimental Setup to Investigate Mirror Visual Feedback Effects on Cross-Education for an Intricate Finger Sequence Movement Task
Source: Research Square preprint supplement (doi:10.21203/rs.3.rs-6957809/v1), 2025-10-08
Supplement: Supplementary file 1 [file c2b24cdaa8dff9bf73f69a85.docx]

**Supplementary Video 1:** Experimental Task Performed with Normal and Mirror Visual Feedback

**Legend:** This video shows a participant performing the typing task under two visual feedback conditions: (1) Normal feedback, where the virtual hands in the VR environment accurately replicate the movements of the real hands in real-time, and (2) Mirror feedback, where the movements of the typing hand are mirrored in real-time by the contralateral virtual hand in the VR environment. The video simultaneously displays both the participant’s real hand movements and the corresponding virtual hand animations in VR space.
